# Supplementary material for: Association between Statins Administration and Influenza Susceptibility: A Systematic Review and Meta-Analysis of Longitudinal Studies
Source: MDPI journal article supplement (doi:10.3390/v16020278), 2024-02-10
Supplement: s1 [file s1]

**Table S1.** The quality assessment by Newcastle-Ottawa Quality Assessment Scale (NOS) for cohort studies.

| COHORT STUDIES |    | Selection |    |    | Comparability |    | Outcome |    | Score/Quality/  |
|----------------|----|-----------|----|----|---------------|----|---------|----|-----------------|
| Studies        | Q1 | Q2        | Q3 | Q4 | Q5            | Q6 | Q7      | Q8 |                 |
| Izurieta, 2018 | *  | *         | *  | *  | **            | *  | *       | *  | 9(good)         |
| McLean, 2016   | *  | -         | *  | *  | **            | *  | *       | -  | 7(good)         |
| Magulick, 2014 | *  | -         | *  | *  | *             | *  | *       | -  | 6(satisfactory) |

Note: Q1: Representativeness of the exposed cohort; Q2: Selection of the non-exposed cohort; Q3: Ascertainment of exposure; Q4: Demonstration that outcome of interest was not present at start of the study; Q5: Comparability of cohorts on the basis of the design or analysis; Q6: Assessment of outcome; Q7: Was follow-up long enough for outcomes to occur; Q8: Adequacy of follow up of cohorts.

**Table S2.** The quality assessment by Newcastle-Ottawa Quality Assessment Scale (NOS) for case-control studies.

| CASE-CONTROL STUDIES |    | Selection |    |    | Comparability |    | Outcome |    | Score/Quality/  |
|----------------------|----|-----------|----|----|---------------|----|---------|----|-----------------|
| Studies              | Q1 | Q2        | Q3 | Q4 | Q5            | Q6 | Q7      | Q8 |                 |
| Chung, 2023          | *  | *         | -  | *  | **            | *  | *       | -  | 7(good)         |
| MacIntyre, 2021      | -  | *         | -  | *  | *             | *  | *       | -  | 5(satisfactory) |

Note: Q1: Is the case definition adequate? Q2: Representativeness of the cases.; Q3: Selection of Controls; Q4: Definition of Controls; Q5: Comparability of cases and controls on the basis of the design or analysis; Q6: Ascertainment of exposure; Q7: Same method of ascertainment for cases and controls; Q8: Non-Response rate.

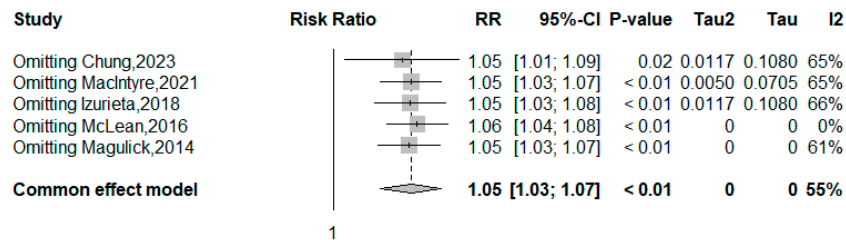

**Figure S1.** Sensitivity analysis of risk ratio of overall statins administration on the risk of influenza infection.

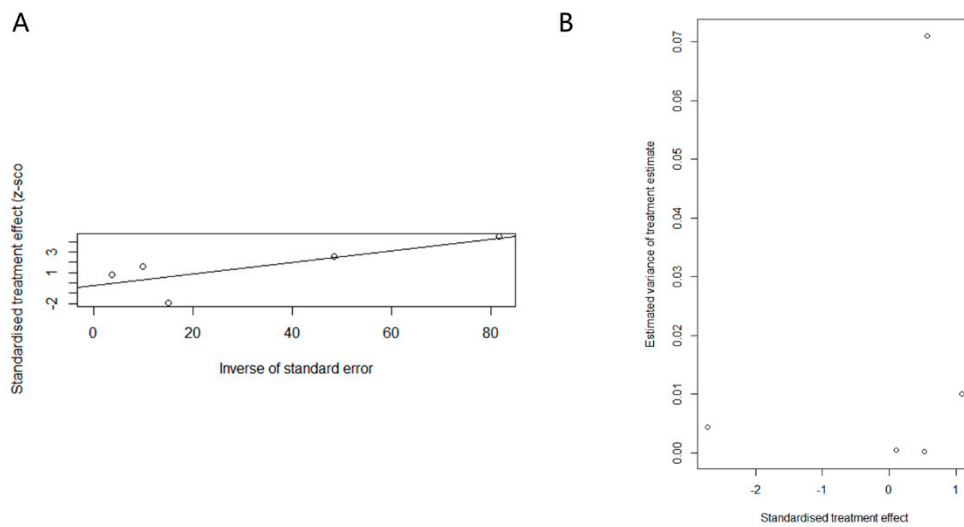

**Figure S2.** Publication bias tests. (A) Egger's test,  $t = -0.25$ ,  $df = 3$ ,  $p\text{-value} = 0.819$ ; (B) Begg's test,  $z = 0.24$ ,  $p\text{-value} = 0.807$ .

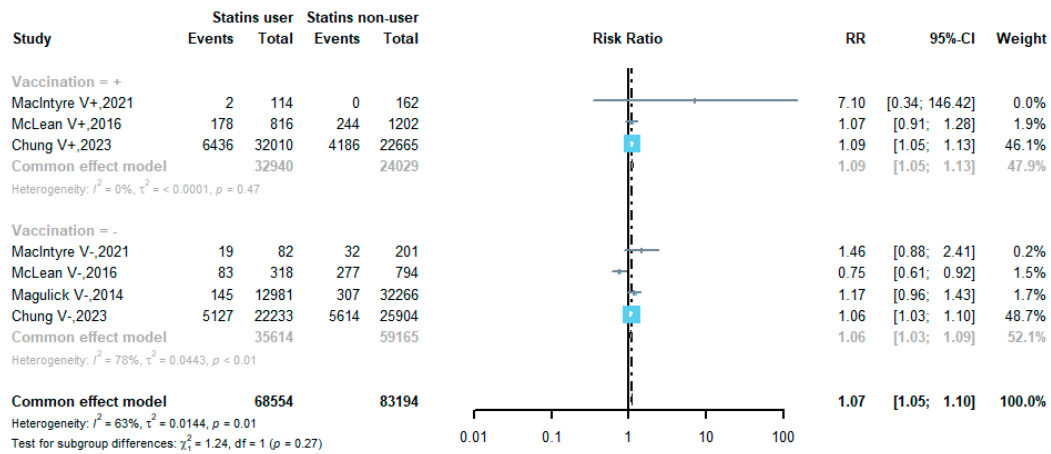

**Figure S3.** Subgroup analysis of risk ratio of statins administration matching for participants' vaccination status.
